# Supplementary figures and images for: Rapid visual detection of SARS-CoV-2 by colorimetric loop-mediated isothermal amplification
Source: PubMed Central journal article supplement — Biotechniques. 2021 Apr 6:10.2144/btn-2020-0159. doi: 10.2144/btn-2020-0159 (PMC8023013; doi:10.2144/btn-2020-0159), 2021-04-06

# Supplementary Figure 1

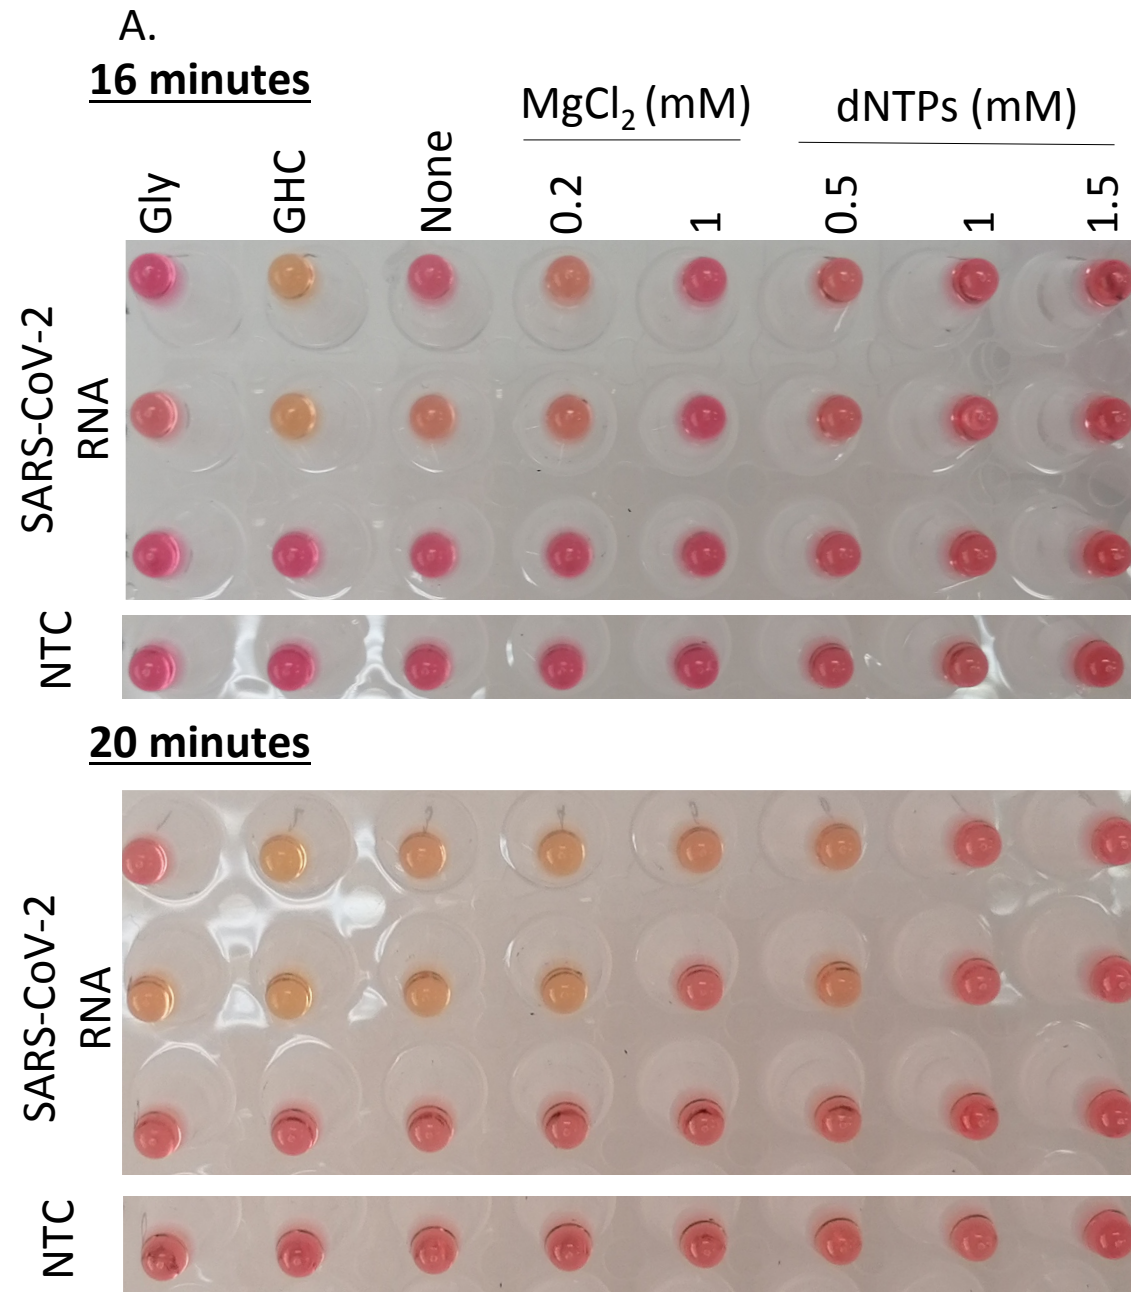

**B.**

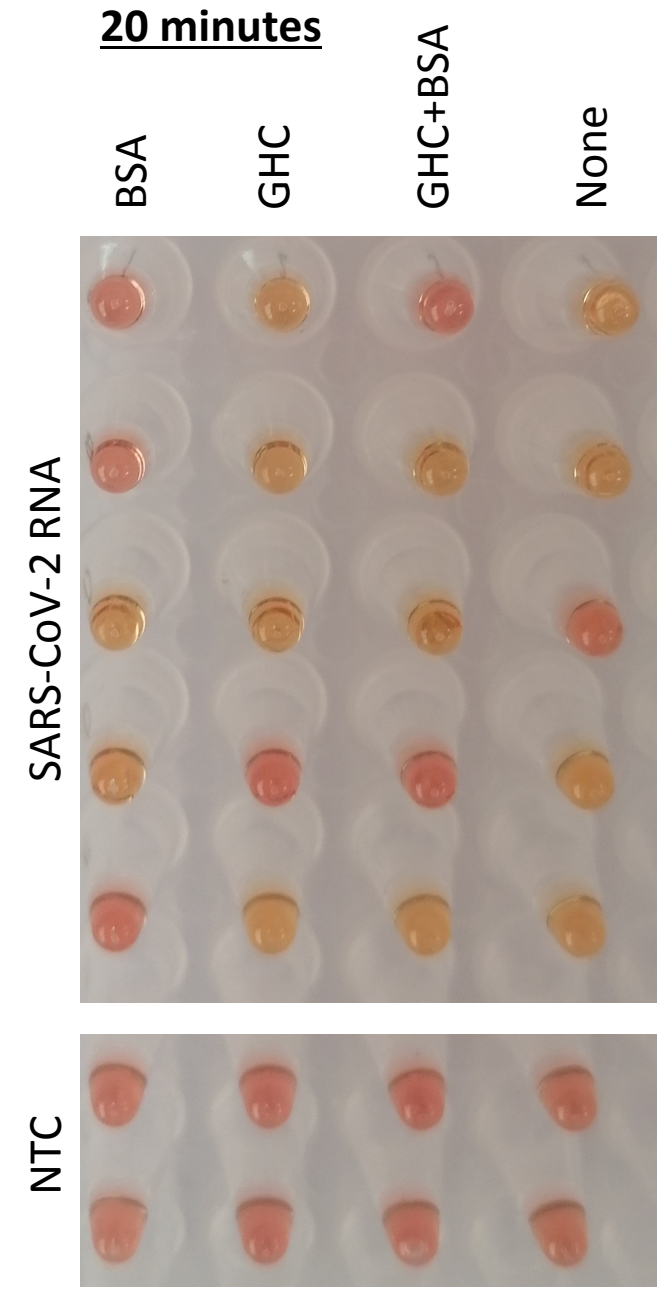

Supplement: Supplementary_Figure_1.pdf [file Supplementary_Figure_1.pdf]

# Supplementary Figure 2

A.

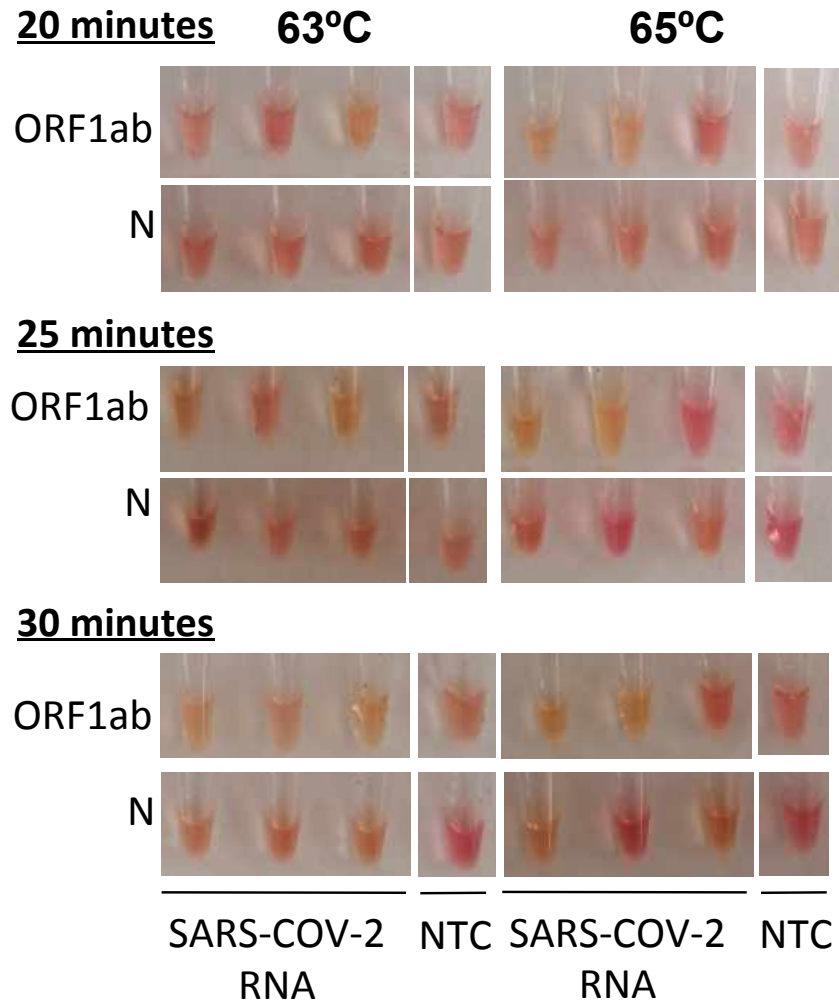

B.

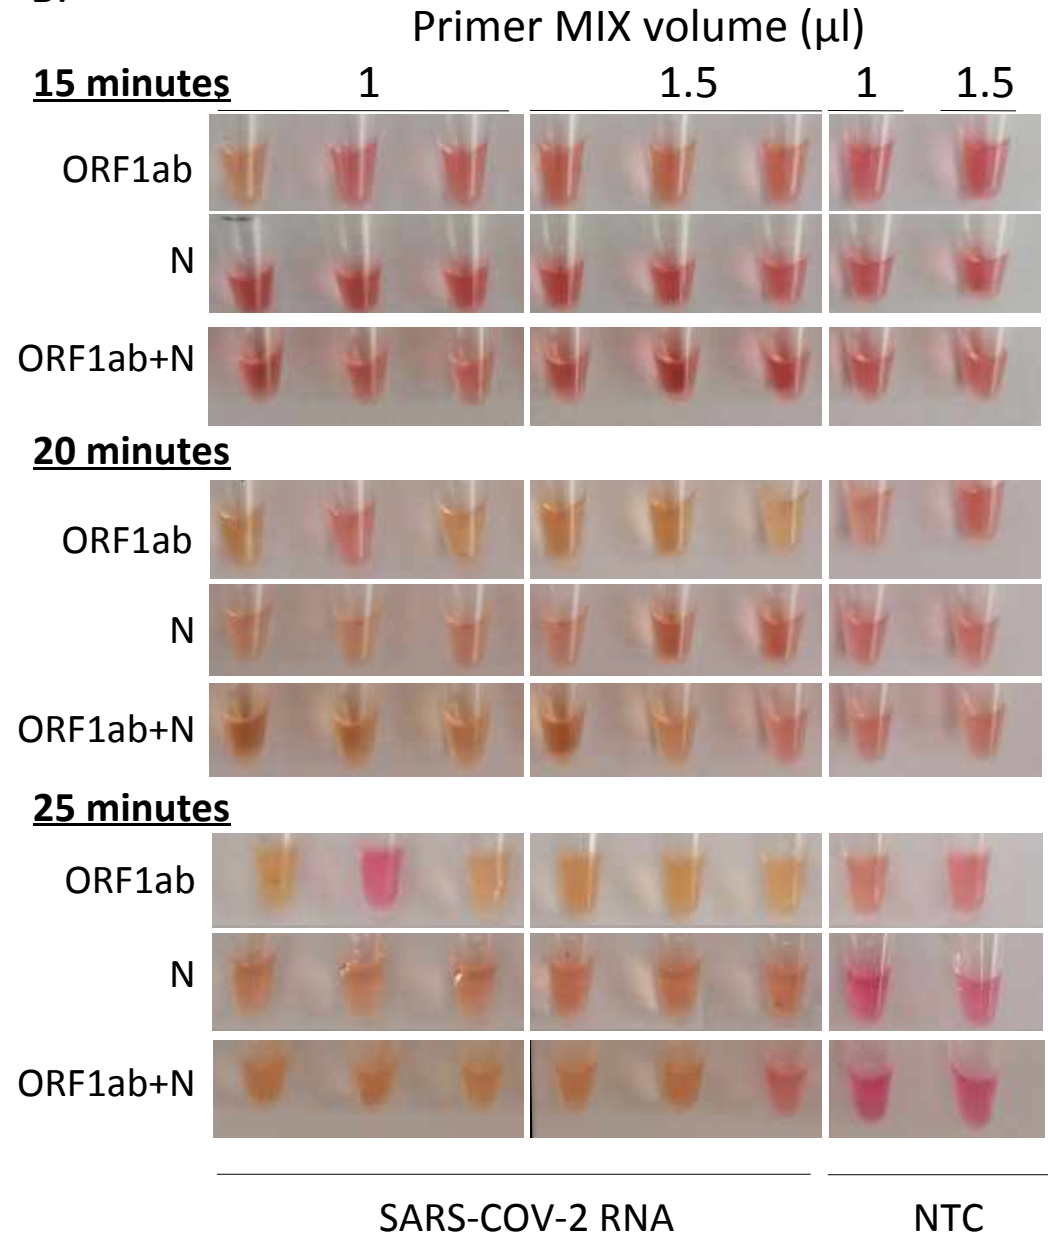

Supplement: Supplementary_Figure_2.pdf [file Supplementary_Figure_2.pdf]
